# Supplementary material for: Genes possibly related to symbiosis in early life stages of Acropora tenuis inoculated with Symbiodinium microadriaticum
Source: PubMed Central journal article supplement (PMC10584924; doi:10.1038/s42003-023-05350-8), 2023-10-18
Supplement: 42003_2023_5350_MOESM2_ESM.pdf [file 42003_2023_5350_MOESM2_ESM.pdf]

Supplementary Information for

**Genes possibly related to symbiosis in early life stages of *Acropora tenuis* inoculated with *Symbiodinium microadriaticum***

Yuki Yoshioka <sup>1,2\*</sup>, Yi-Ling Chiu <sup>1</sup>, Taiga Uchida <sup>1</sup>, Hiroshi Yamashita <sup>3</sup>, Go Suzuki <sup>3</sup>, and Chuya Shinzato <sup>1\*</sup>

<sup>1</sup> Atmosphere and Ocean Research Institute, The University of Tokyo, Kashiwa, Chiba, Japan

<sup>2</sup> Marine Genomics Unit, Okinawa Institute of Science and Technology Graduate University, Onna, Okinawa, Japan

<sup>3</sup> Fisheries Technology Institute, Japan Fisheries Research and Education Agency, Ishigaki, Okinawa, Japan

\* Corresponding author: Yuki Yoshioka (y.yoshioka@oist.jp) and Chuya Shinzato (c.shinzato@aori.u-tokyo.ac.jp)

Supplementary Tables

Supplementary Tables 1 pp. 2

Supplementary Tables 2 pp. 3

Supplementary Figures

Supplementary Fig. 1 pp. 4

Supplementary Fig. 2 pp. 5

Supplementary Fig. 3 pp. 6

Supplementary Fig. 4 pp. 7

Supplementary Fig. 5 pp. 8

Supplementary Fig. 6 pp. 9

Supplementary Fig. 7 pp. 10

Supplementary Fig. 8 pp. 11

Supplementary Fig. 9 pp. 12

Supplementary Fig. 10 pp. 13

Supplementary Fig. 11 pp. 14

Supplementary Fig. 12 pp. 15

Supplementary Fig. 13 pp. 16

Supplementary Fig. 14 pp. 17

Supplementary Fig. 15 pp. 18

References pp. 19

**Supplementary Table 1. Numbers of Smic acquired by *Acropora tenuis*.**

| Developmental stages | Uptake efficiency (Average $\pm$ SD) | No. of algae in corals (Average $\pm$ SE) | Sampling time <sup>1</sup> | Reference             |
|----------------------|--------------------------------------|-------------------------------------------|----------------------------|-----------------------|
|                      | 93.3 $\pm$ 5.8%                      | 11.7 $\pm$ 2.4 cells/larva                | 4 dpi                      |                       |
| Planula larvae       | 93.3 $\pm$ 11.5%                     | 55.4 $\pm$ 6.8 cells/larva                | 8 dpi                      | Yamashita et al. 2018 |
|                      | 90 $\pm$ 10%                         | 185.1 $\pm$ 23.3 cells/larva              | 12 dpi                     |                       |
| <hr/>                |                                      |                                           |                            |                       |
| Primary polyps       | 100%                                 | 1138.9 $\pm$ 249 cells/polyp              | 10 dpi                     | This study            |
|                      | 100%                                 | 4241.7 $\pm$ 872 cells/polyp              | 20 dpi                     |                       |

<sup>1</sup> dpi indicates days post-inoculation.

**Supplementary Table 2. Summary of numbers of clean reads, mapped reads to *Acropora tenuis* gene models, and expressed genes.**

| DRA accession | Samples     | No. of read after QC | Total base of read after QC | Mapping rate |
|---------------|-------------|----------------------|-----------------------------|--------------|
| DRR411688     | 10dpi cont1 | 29,408,584           | 1,465,416,109               | 74.0%        |
| DRR411689     | 10dpi cont2 | 13,283,612           | 659,495,489                 | 59.8%        |
| DRR411690     | 10dpi cont3 | 8,107,499            | 403,425,697                 | 61.4%        |
| DRR411691     | 10dpi smic1 | 6,090,892            | 302,942,762                 | 56.7%        |
| DRR411692     | 10dpi smic2 | 7,325,435            | 363,895,387                 | 55.0%        |
| DRR411693     | 10dpi smic3 | 9,223,493            | 459,279,240                 | 63.2%        |
| DRR411694     | 20dpi cont1 | 9,402,985            | 467,715,310                 | 64.5%        |
| DRR411695     | 20dpi cont2 | 8,390,335            | 417,559,557                 | 63.0%        |
| DRR411696     | 20dpi smic1 | 8,646,344            | 430,486,994                 | 58.6%        |
| DRR411697     | 20dpi smic2 | 6,786,510            | 337,603,727                 | 60.1%        |
|               | Average     | 10,666,569           | 530,782,027                 | 61.6%        |

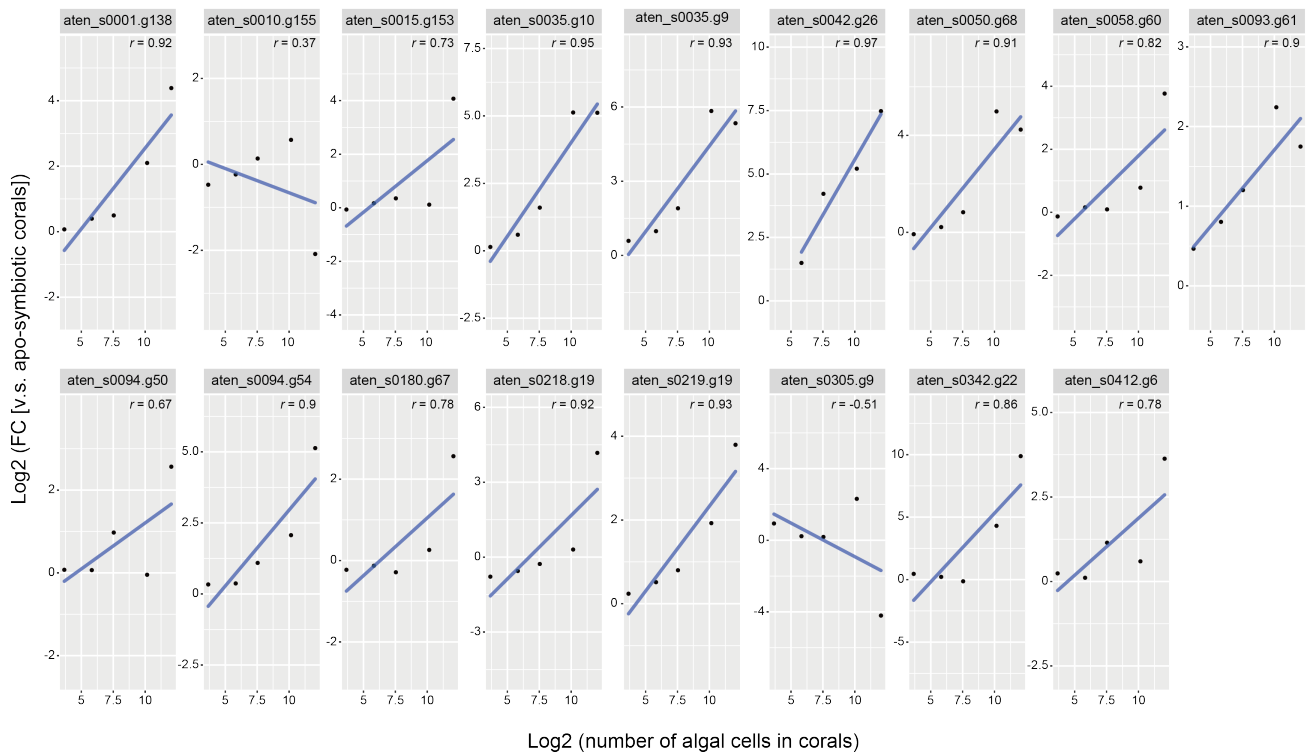

**Supplementary Fig. 1. Correlation analysis between gene expression levels and algal symbiont number in corals.**

Correlation between  $\log_2$  (relative gene expression levels of corals inoculated with *Smic*) and  $\log_2$  (number of algal cells in corals) were examined using the function “cor.test” in R. Gene IDs are shown at the top of each box.  $r$  indicates Pearson correlation. Blue line indicates regression line drawn with the function “stat\_smooth (method = lm)” in ggplot2 in R. Relative gene expression levels of planula larvae and primary polyps are provided in Supplementary Data 1. Numbers of algal cell numbers in corals are provided in Supplementary Table 1.

Planula larvae  
(Yoshioka et al. 2021)

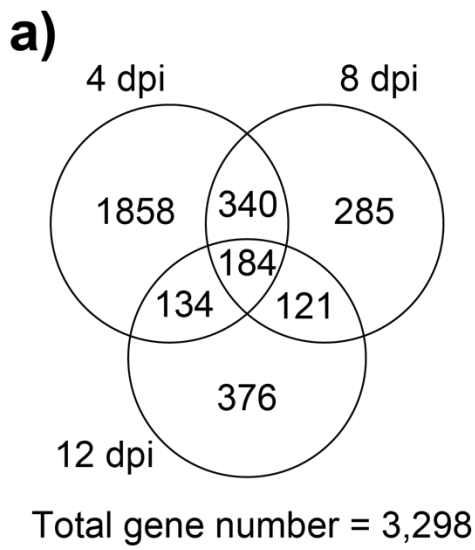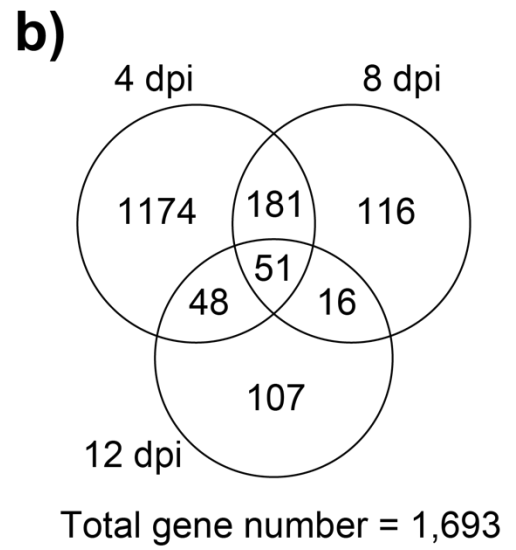

Primary polyps  
(This study)

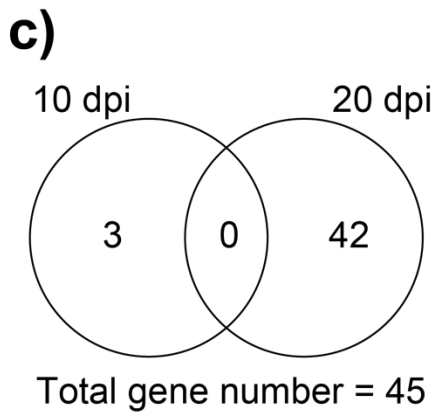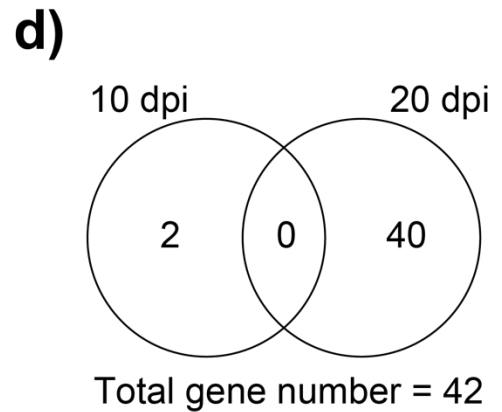

**Supplementary Fig. 2. Summary of genes for which expression levels differed by age (days).**

- a)** Venn-diagram of the number of DEGs restricted to planula larvae inoculated with Smic.
- b)** Venn-diagram of the number of DEGs restricted to planula larvae inoculated with Smic after removal of genes for which expression depends on age of planula larvae between 4, 8, and 12 dpi.
- c)** Venn-diagram of the number of DEGs restricted to primary polyps inoculated with Smic.
- d)** Venn-diagram of the number of DEGs restricted to primary polyps inoculated with Smic after removal of genes for which expression differs by age of primary polyps between 10 and 20 dpi.

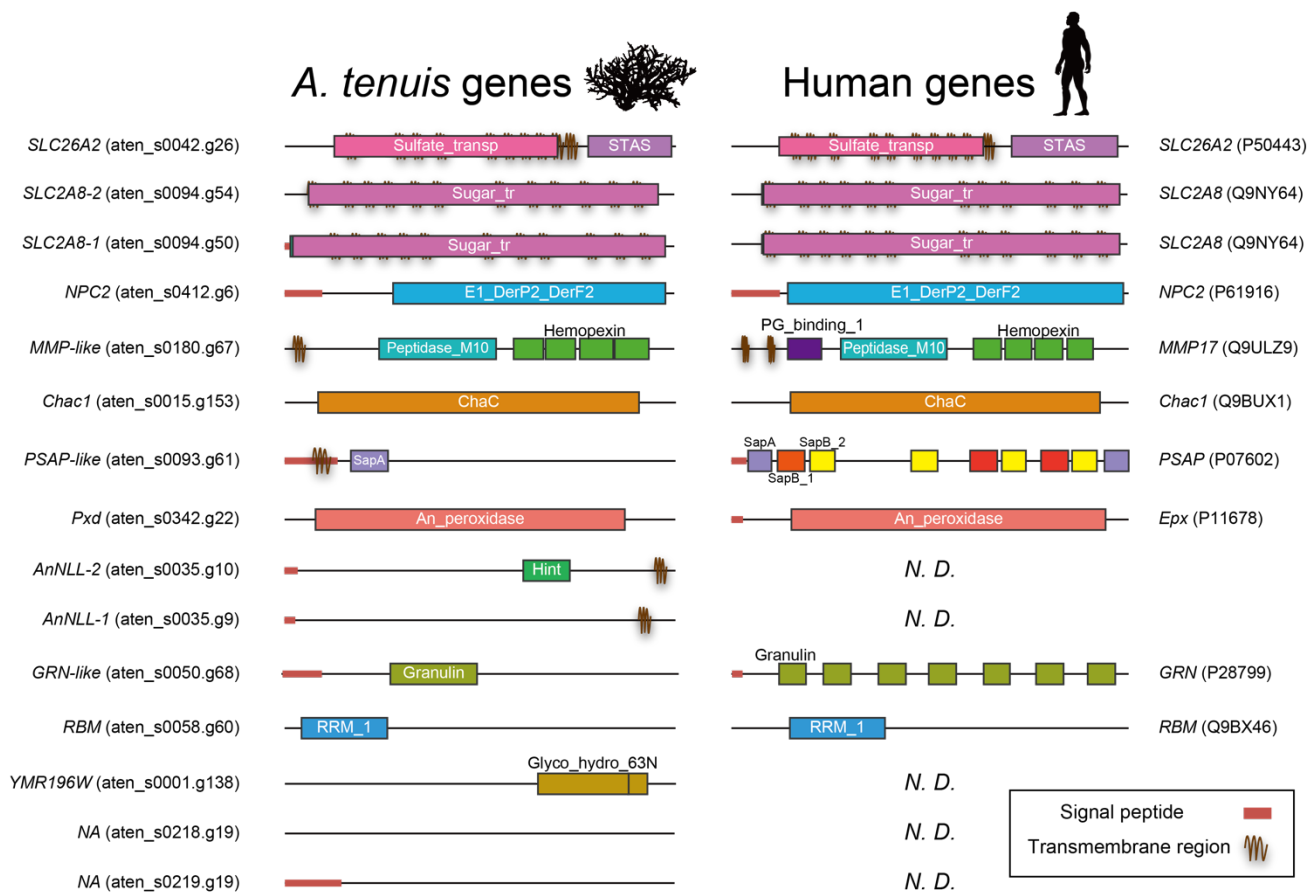

**Supplementary Fig. 3. Comparison of domain composition of 15 core symbiosis-related genes with human genes.**

Signal peptides, transmembrane regions, and evolutionarily conserved protein domains are colored separately. Short names of protein domains are shown around protein domains. Gene names and UniProt IDs for *A. tenuis* and human are provided at left and right, respectively. Species icons are from phylopic.org.

Uncharacterized protein (*YMR196W*)  
(Orthogroup 1830)

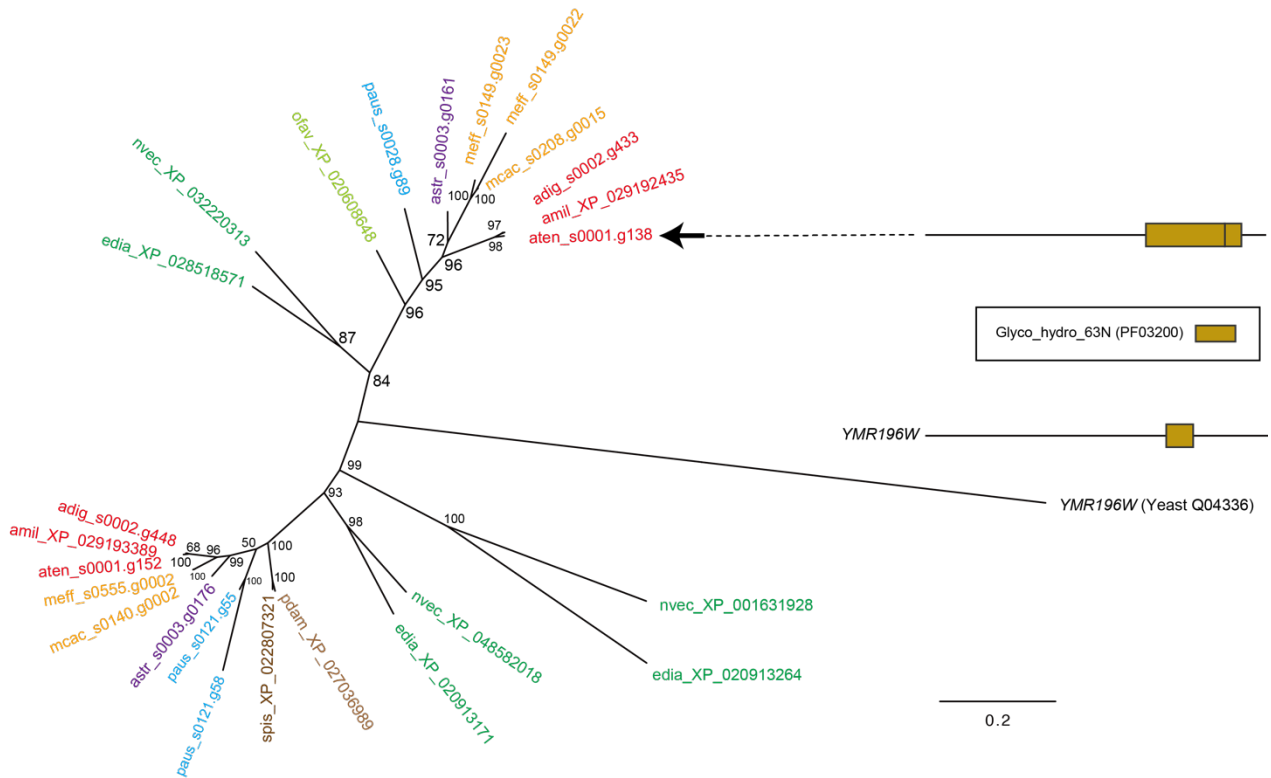

**Supplementary Fig. 4. Molecular phylogenetic analysis of an uncharacterized protein (*YMR196W*).**

897 gap-trimmed, aligned, amino acids were used for phylogenetic tree construction (LG model). Genes are color coded: *Acropora* (red), *Montipora* (yellow), *Astreopora* (purple), *Porites* (light-blue), *Stylophora* (brown), *Pocillopora* (light-brown), *Orbicella* (light-green), sea anemones (green), and yeast (black). Species names are abbreviated: *A. tenuis* (aten), *A. digitifera* (adig), *A. millepora* (amil), *M. cactus* (mcac), *M. efflorescens* (meff), *Astreopora myriophthalma* (astr), *Porites australiensis* (paus), *S. pistillata* (spis), *O. faveolata* (ofav), *Pocillopora damicornis* (pdam), *Exaiptasia diaphana* (edia), and *Nematostella vectensis* (nvec). Gene IDs are shown following species names. A black arrow indicates the DEG. Sequence features of the DEG and the reference gene (Yeast *YMR196W*) is shown. Note that these sequence features do not reflect sequence lengths.

Glutathione-specific gamma-glutamylcyclotransferase (*Chac*)  
(Orthogroup 1940)

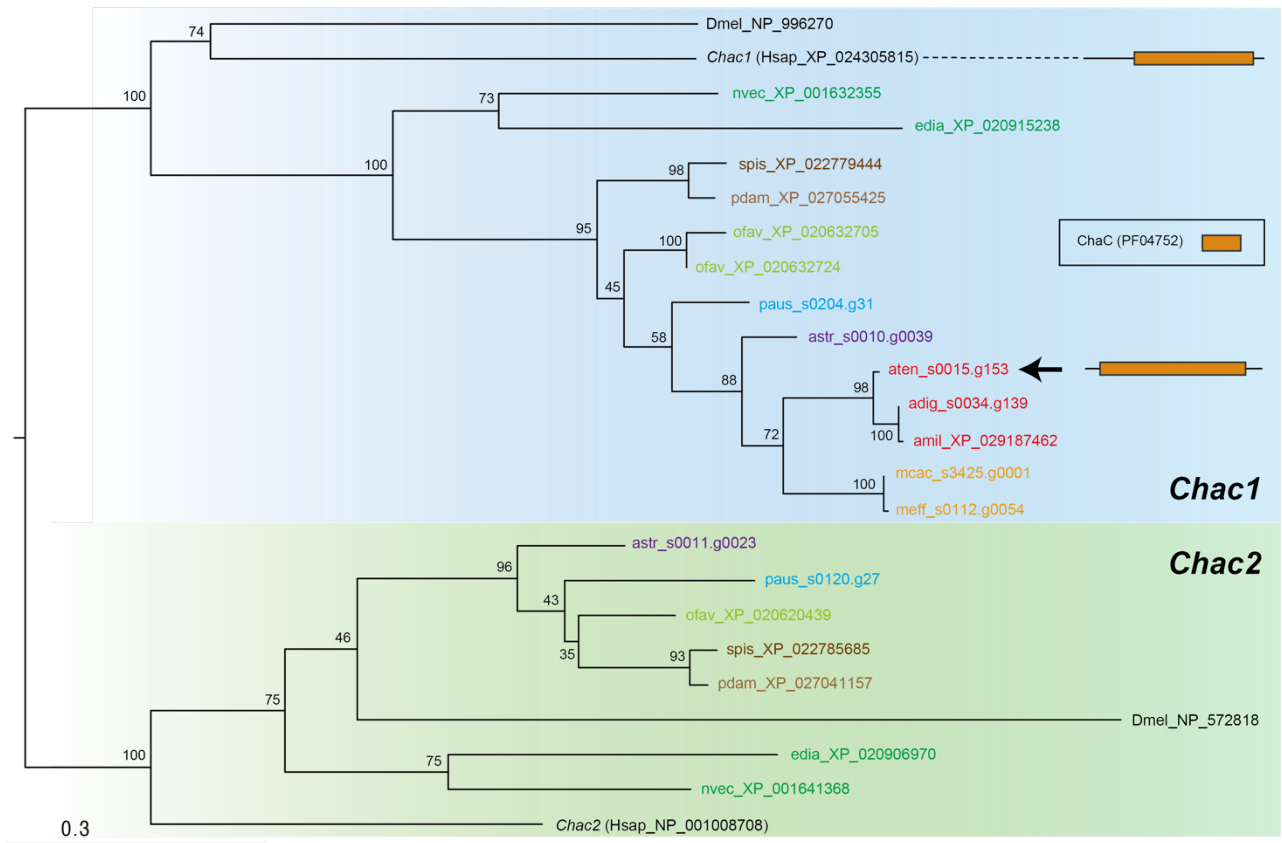

**Supplementary Fig. 5. Molecular phylogenetic analysis of a glutathione-specific gamma-glutamyl cyclotransferase (*Chac*).**

179 gap-trimmed, aligned amino acids were used for phylogenetic tree construction (LG model). Genes are color coded: *Acropora* (red), *Montipora* (yellow), *Astreopora* (purple), *Porites* (light-blue), *Stylophora* (brown), *Pocillopora* (light-brown), *Orbicella* (light-green), sea anemones (green), and bilaterians (black). Species names are abbreviated: *A. tenuis* (aten), *A. digitifera* (adig), *A. millepora* (amil), *M. cactus* (mcac), *M. efflorescens* (meff), *Astreopora myriophthalma* (astr), *Porites australiensis* (paus), *S. pistillata* (spis), *O. faveolata* (ofav), *Pocillopora damicornis* (pdam), *Exaiptasia diaphana* (edia), *Nematostella vectensis* (nvec), *D. melanogaster* (dmel), and *H. sapiens* (hsap). Gene IDs follow species names. A black arrow indicates the DEG. The sequence feature of the DEG and the reference gene (Human *Chac1*) are shown. Note that these sequence features do not reflect sequence lengths.



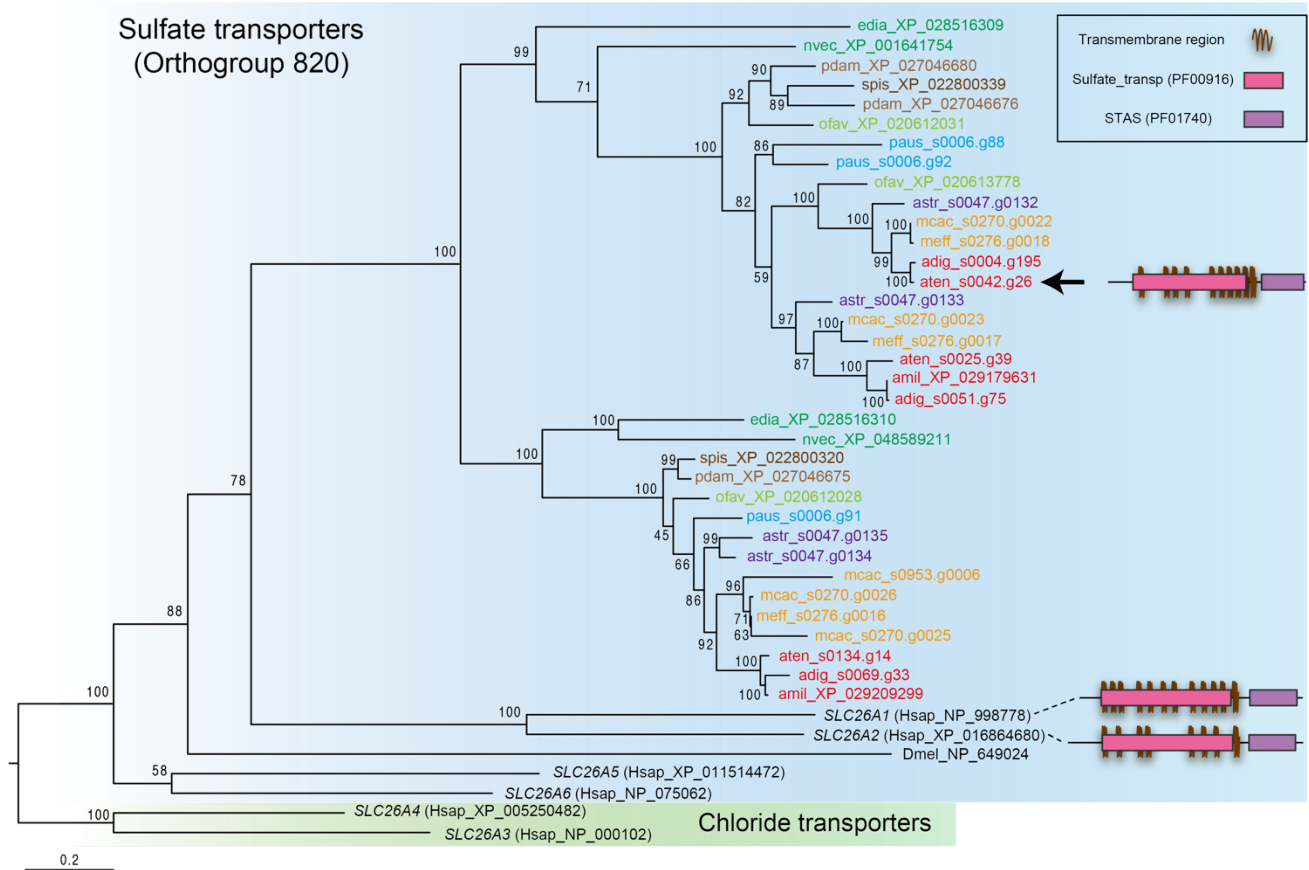

**Supplementary Fig. 6. Molecular phylogenetic analysis of sulfate transporters.**

603 gap-trimmed, aligned amino acids were used for phylogenetic tree construction (LG model). Genes are color coded: *Acropora* (red), *Montipora* (yellow), *Astreopora* (purple), *Porites* (light-blue), *Stylophora* (brown), *Pocillopora* (light-brown), *Orbicella* (light-green), sea anemones (green), and bilaterians (black). Species names are abbreviated: *A. tenuis* (aten), *A. digitifera* (adig), *A. millepora* (amil), *M. cactus* (mcac), *M. efflorescens* (meff), *Astreopora myriophthalma* (astr), *Porites australiensis* (paus), *S. pistillata* (spis), *O. faveolata* (ofav), *Pocillopora damicornis* (pdam), *Exaiptasia diaphana* (edia), *Nematostella vectensis* (nvec), *D. melanogaster* (dmel), and *H. sapiens* (hsap). Gene IDs follow species names. A black arrow indicates the DEG. The sequence feature of the DEG and the reference genes (Human *SLC26A1* and *SLC26A2*) is shown. The chloride transporters of *H. sapiens* were used as an outgroup. Note that these sequence features do not reflect sequence lengths.

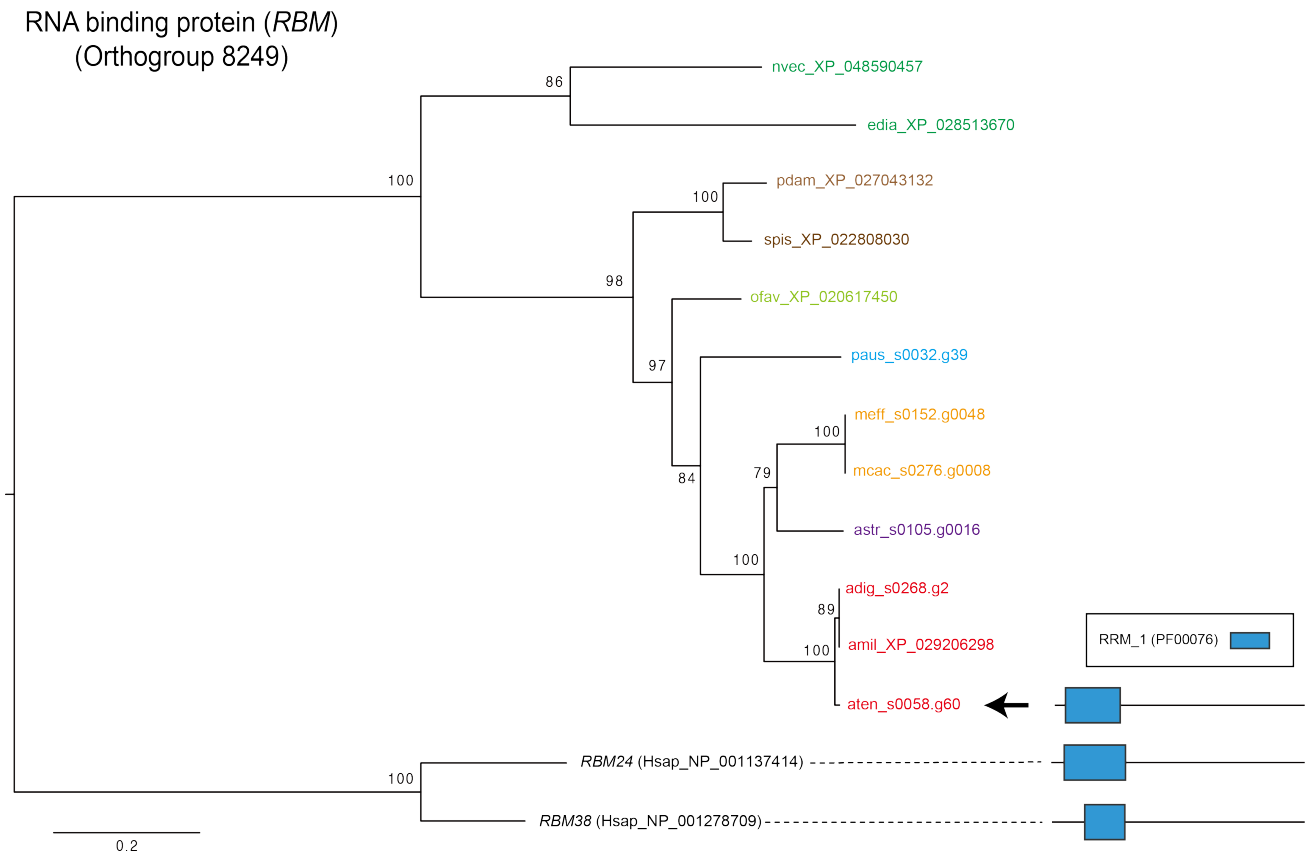

**Supplementary Fig. 7. Molecular phylogenetic analysis of an RNA binding protein (*RBM*).**

237 gap-trimmed, aligned amino acids were used for phylogenetic tree construction (JTT model). Genes are color coded: *Acropora* (red), *Montipora* (yellow), *Astreopora* (purple), *Porites* (light-blue), *Stylophora* (brown), *Pocillopora* (light-brown), *Orbicella* (light-green), sea anemones (green), and human (black). Species names are abbreviated: *A. tenuis* (aten), *A. digitifera* (adig), *A. millepora* (amil), *M. cactus* (mcac), *M. efflorescens* (meff), *Astreopora myriophthalma* (astr), *Porites australiensis* (paus), *S. pistillata* (spis), *O. faveolata* (ofav), *Pocillopora damicornis* (pdam), *Exaiptasia diaphana* (edia), *Nematostella vectensis* (nvec), and *H. sapiens* (hsap). Gene IDs follow species names. A black arrow indicates the DEG. The sequence feature of the DEG and the reference genes (Human *RBM24* and *RBM38*) are shown. Note that these sequence features do not reflect sequence lengths.

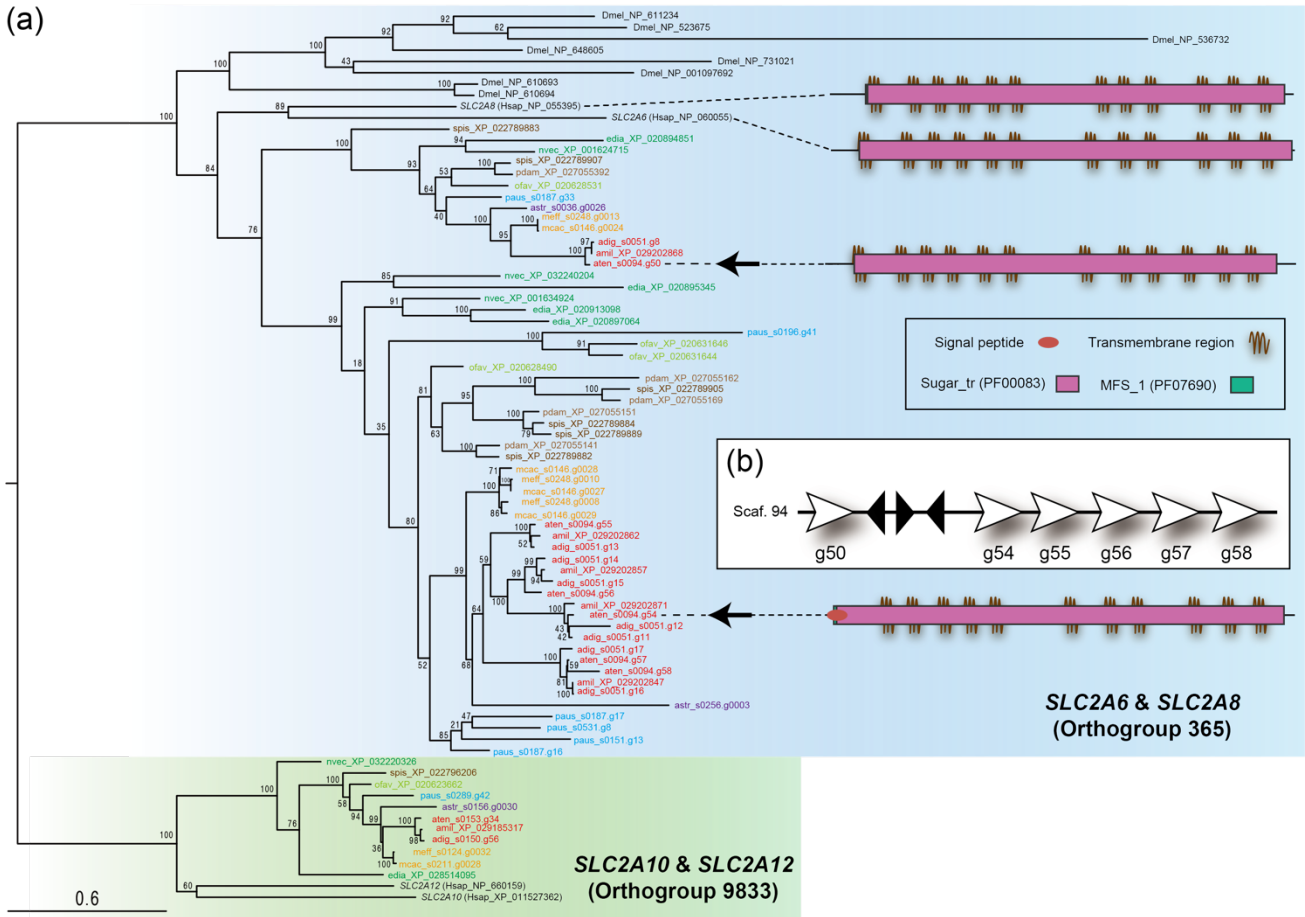

**Supplementary Fig. 8. Molecular phylogenetic analysis of sugar transporters.**

**(a)** Phylogenetic tree of sugar transporters.

468 gap-trimmed, aligned amino acids were used for phylogenetic tree construction (LG model). Genes are color coded: *Acropora* (red), *Montipora* (yellow), *Astreopora* (purple), *Porites* (light-blue), *Stylophora* (brown), *Pocillopora* (light-brown), *Orbicella* (light-green), sea anemones (green), and bilaterians (black). Species names are abbreviated: *A. tenuis* (aten), *A. digitifera* (adig), *A. millepora* (amil), *M. cactus* (mcac), *M. efflorescens* (meff), *Astreopora myriophthalma* (astr), *Porites australiensis* (paus), *S. pistillata* (spis), *O. faveolata* (ofav), *Pocillopora damicornis* (pdam), *Exaiptasia diaphana* (edia), *Nematostella vectensis* (nvec), *D. melanogaster* (dmel), and *H. sapiens* (hsap). Gene IDs follow species names. Black arrows indicate the DEGs. The sequence feature of the DEGs and the reference gene (Human *SLC2A6* and *SLC2A8*) is shown. Another sugar transporter genes (Orthogroup 9833) were used as an outgroup. Note that these sequence features do not reflect sequence lengths.

**(b)** Tandem duplication of sugar transporter genes in the *A. tenuis* genome.

White arrows indicate tandemly duplicated sugar transporter genes on scaffold 94 and their transcription direction.

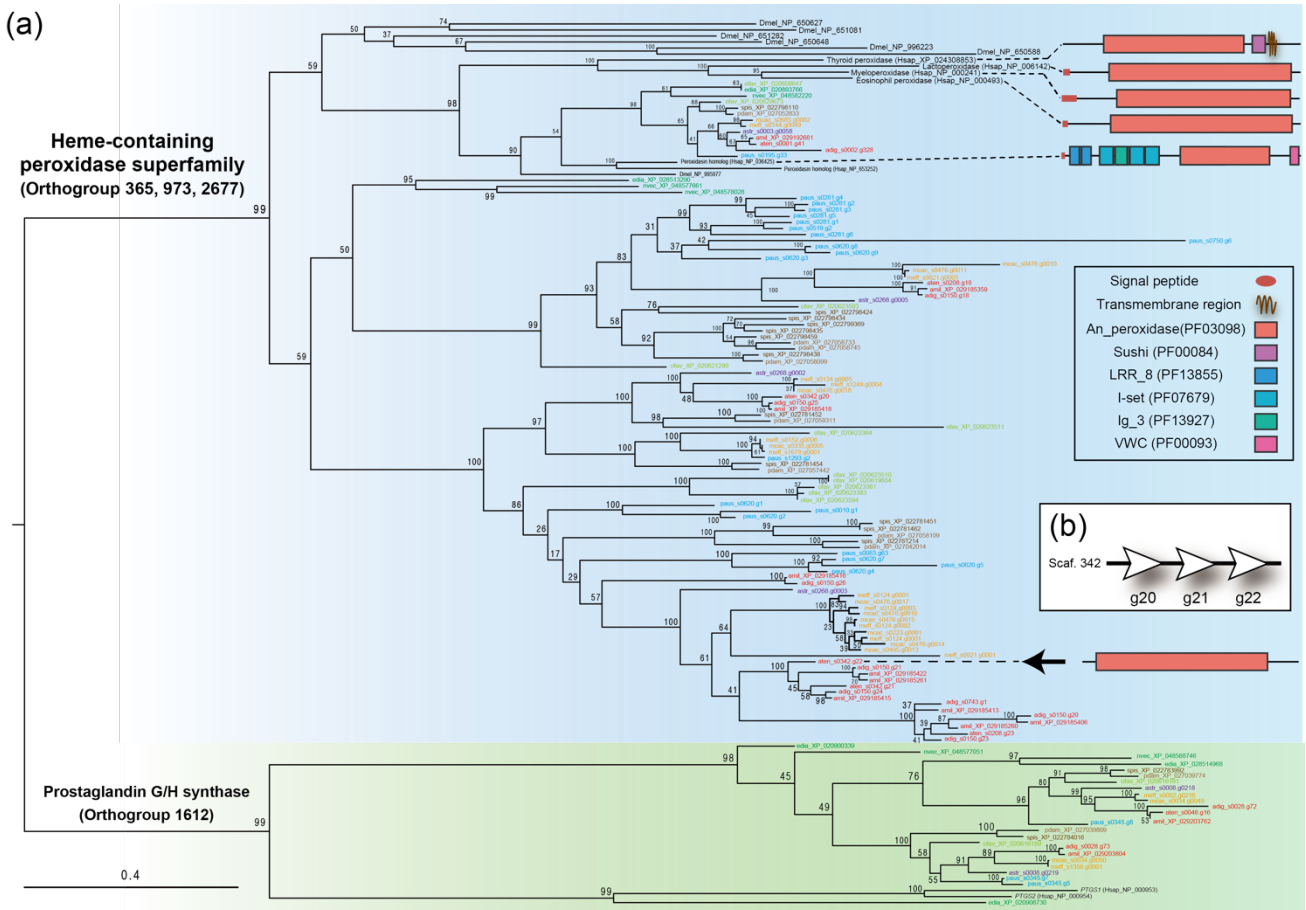

**Supplementary Fig. 9. Molecular phylogenetic analysis of heme-containing peroxidase (*Pxd*) superfamily.**

(a) Phylogenetic tree of *Pxd* superfamily.

503 gap-trimmed, aligned amino acids were used for phylogenetic tree construction (WAG model). Genes are color coded: *Acropora* (red), *Montipora* (yellow), *Astreopora* (purple), *Porites* (light-blue), *Stylophora* (brown), *Pocillopora* (light-brown), *Orbicella* (light-green), sea anemones (green), and bilaterians (black). Species names are abbreviated: *A. tenuis* (aten), *A. digitifera* (adig), *A. millepora* (amil), *M. cactus* (mca), *M. efflorescens* (mef), *Astreopora myriophthalma* (astr), *Porites australiensis* (paus), *S. pistillata* (spis), *O. faveolata* (ofav), *Pocillopora damicornis* (pdam), *Exaiptasia diaphana* (edia), *Nematostella vectensis* (nvec), *D. melanogaster* (dmel), and *H. sapiens* (hsap). Gene IDs follow species names. A black arrow indicates the DEG. The sequence feature of the DEG and the reference genes (Human *TPO*, *LPO*, *MPO*, *EPO*, and *Peroxidasin-homologue*) is shown. Prostaglandin G/H synthases (Orthogroup 1612) were used as an outgroup. Note that these sequence features do not reflect sequence lengths.

(b) Tandem duplication of *Pxd* genes in *A. tenuis* genome.

White arrows indicate tandemly duplicated *Pxd* genes on scaffold 342 and their transcription direction, respectively.

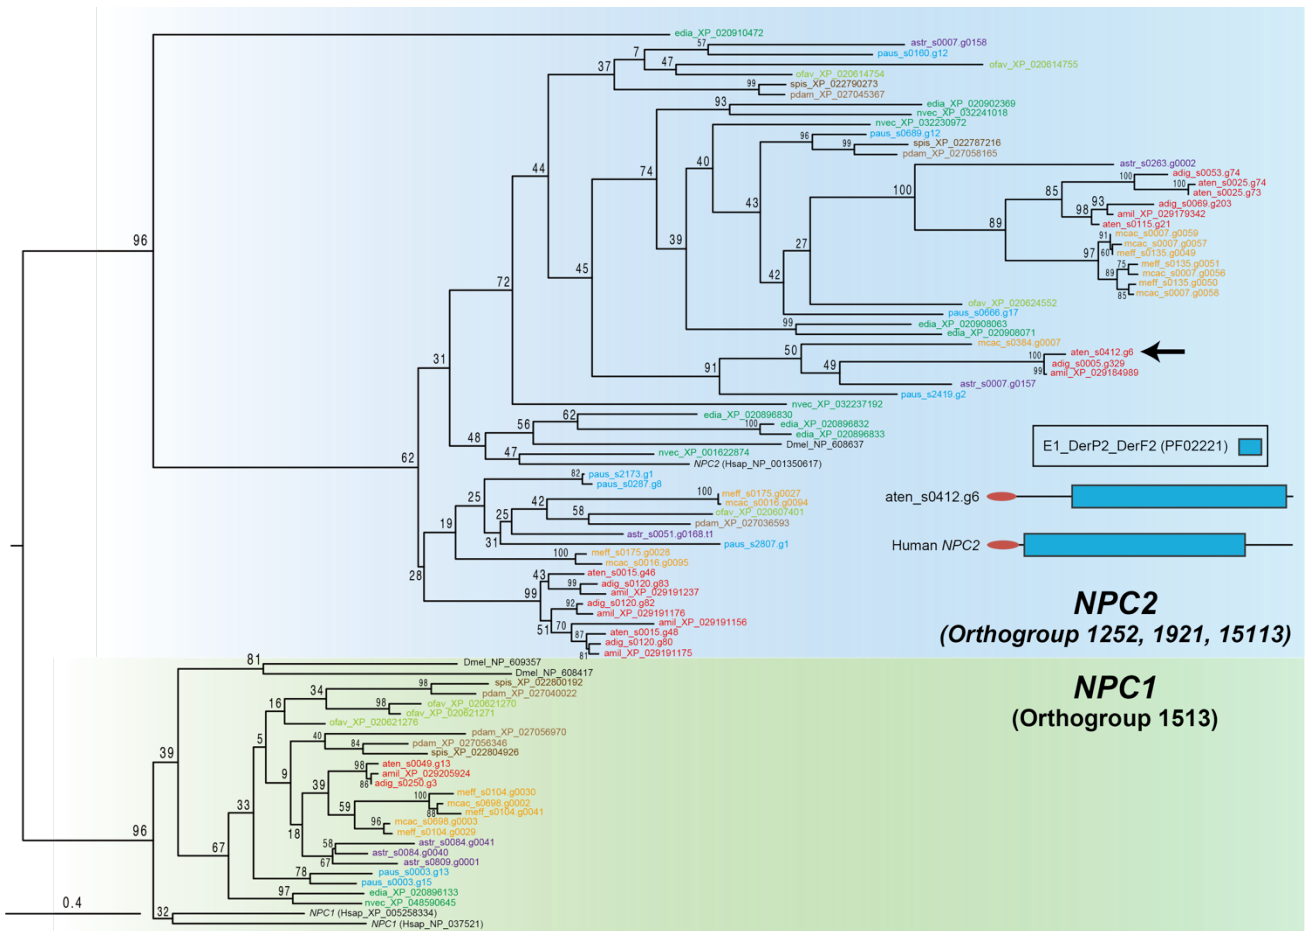

**Supplementary Fig. 10. Molecular phylogenetic analysis of Niemann-pick type C2 sterol transporters (*NPC2*)** 148 gap-trimmed, aligned amino acids were used for phylogenetic tree construction (WAG model). Genes are color coded: *Acropora* (red), *Montipora* (yellow), *Astreopora* (purple), *Porites* (light-blue), *Stylophora* (brown), *Pocillopora* (light-brown), *Orbicella* (light-green), sea anemones (green), and human (black). Species names are abbreviated: *A. tenuis* (aten), *A. digitifera* (adig), *A. millepora* (amil), *M. cactus* (mcaac), *M. efflorescens* (meff), *Astreopora myriophthalma* (astr), *Porites australiensis* (paus), *S. pistillata* (spis), *O. faveolata* (ofav), *Pocillopora damicornis* (pdam), *Exaiptasia diaphana* (edia), *Nematostella vectensis* (nvec), and *H. sapiens* (hsap). Gene IDs follow species names. A black arrow indicates the DEG. The sequence feature of the DEG and the reference gene (Human *NPC2*) is shown. *NPC1* genes (Orthogroup 1513) were used as an outgroup. Note that these sequence features do not reflect sequence lengths.

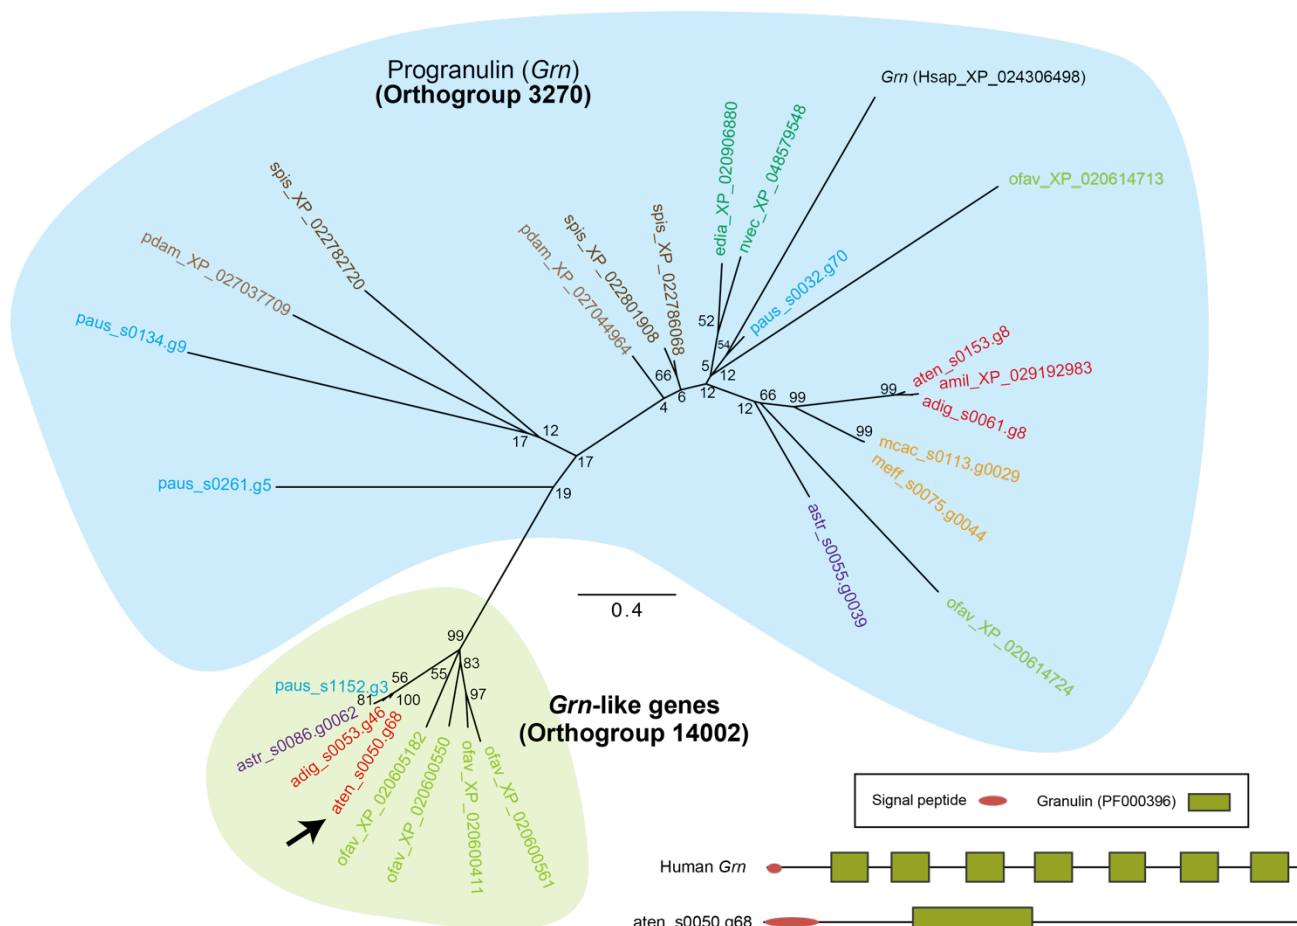

**Supplementary Fig. 11. Molecular phylogenetic analysis of progranulin-like genes (*Grn*).**

177 gap-trimmed, aligned amino acids were used for phylogenetic tree construction (FLU model). Genes are color coded: *Acropora* (red), *Montipora* (yellow), *Astreopora* (purple), *Porites* (light-blue), *Stylophora* (brown), *Pocillopora* (light-brown), *Orbicella* (light-green), sea anemones (green), and human (black). Species names are abbreviated: *A. tenuis* (aten), *A. digitifera* (adig), *A. millepora* (amil), *M. cactus* (mcac), *M. efflorescens* (meff), *Astreopora myriophthalma* (astr), *Porites australiensis* (paus), *S. pistillata* (spis), *O. faveolata* (ofav), *Pocillopora damicornis* (pdam), *Exaiptasia diaphana* (edia), *Nematostella vectensis* (nvec), and *H. sapiens* (hsap). Gene IDs follow species names. A black arrow indicates the DEG. The sequence feature of the DEG and the reference gene (Human *Grn*) is shown. Note that these sequence features do not reflect sequence lengths.

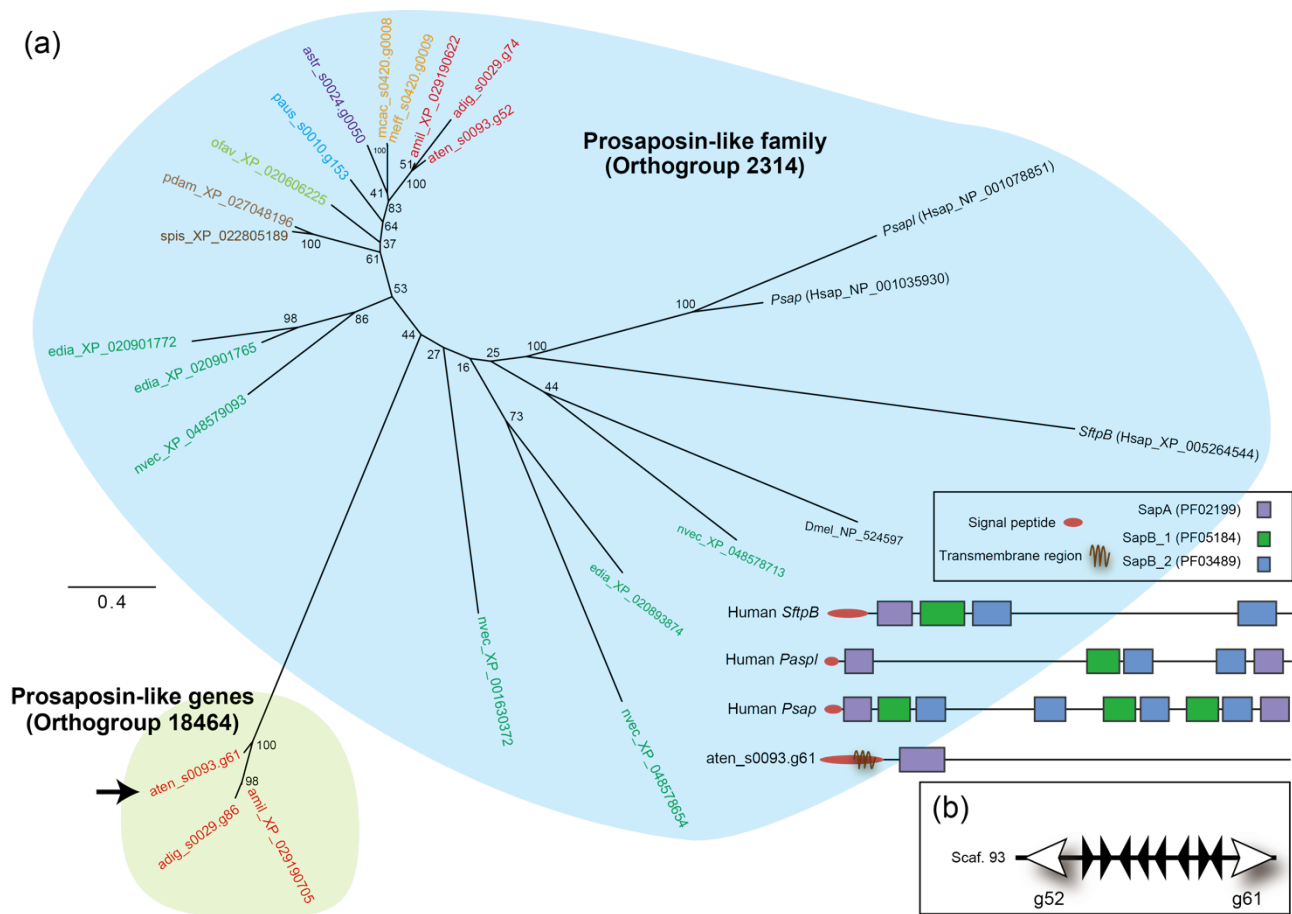

**Supplementary Fig. 12. Molecular phylogenetic analysis of the prosaposin-like family.**

(a) Phylogenetic tree of prosaposin-like genes.

385 gap-trimmed, aligned amino acids were used for phylogenetic tree construction (FLU model). Genes are color coded: *Acropora* (red), *Montipora* (yellow), *Astreopora* (purple), *Porites* (light-blue), *Stylophora* (brown), *Pocillopora* (light-brown), *Orbicella* (light-green), sea anemones (green), and bilaterians (black). Species names are abbreviated: *A. tenuis* (aten), *A. digitifera* (adig), *A. millepora* (amil), *M. cactus* (mcac), *M. efflorescens* (meff), *Astreopora myriophthalma* (astr), *Porites australiensis* (paus), *S. pistillata* (spis), *O. faveolata* (ofav), *Pocillopora damicornis* (pdam), *Exaiptasia diaphana* (edia), *Nematostella vectensis* (nvec), *D. melanogaster* (dmel), and *H. sapiens* (hsap). Gene IDs follow species names. A black arrow indicates the DEG. Sequence features of the DEG and the reference genes (Human *SftpB*, *Paspl*, and *Psap*) is shown. Note that these sequence features do not reflect sequence lengths.

(b) Tandem duplication of *Psap*-like genes in *A. tenuis* genome.

White arrows indicate tandemly duplicated *Psap*-like genes on scaffold 93 and their transcription direction.

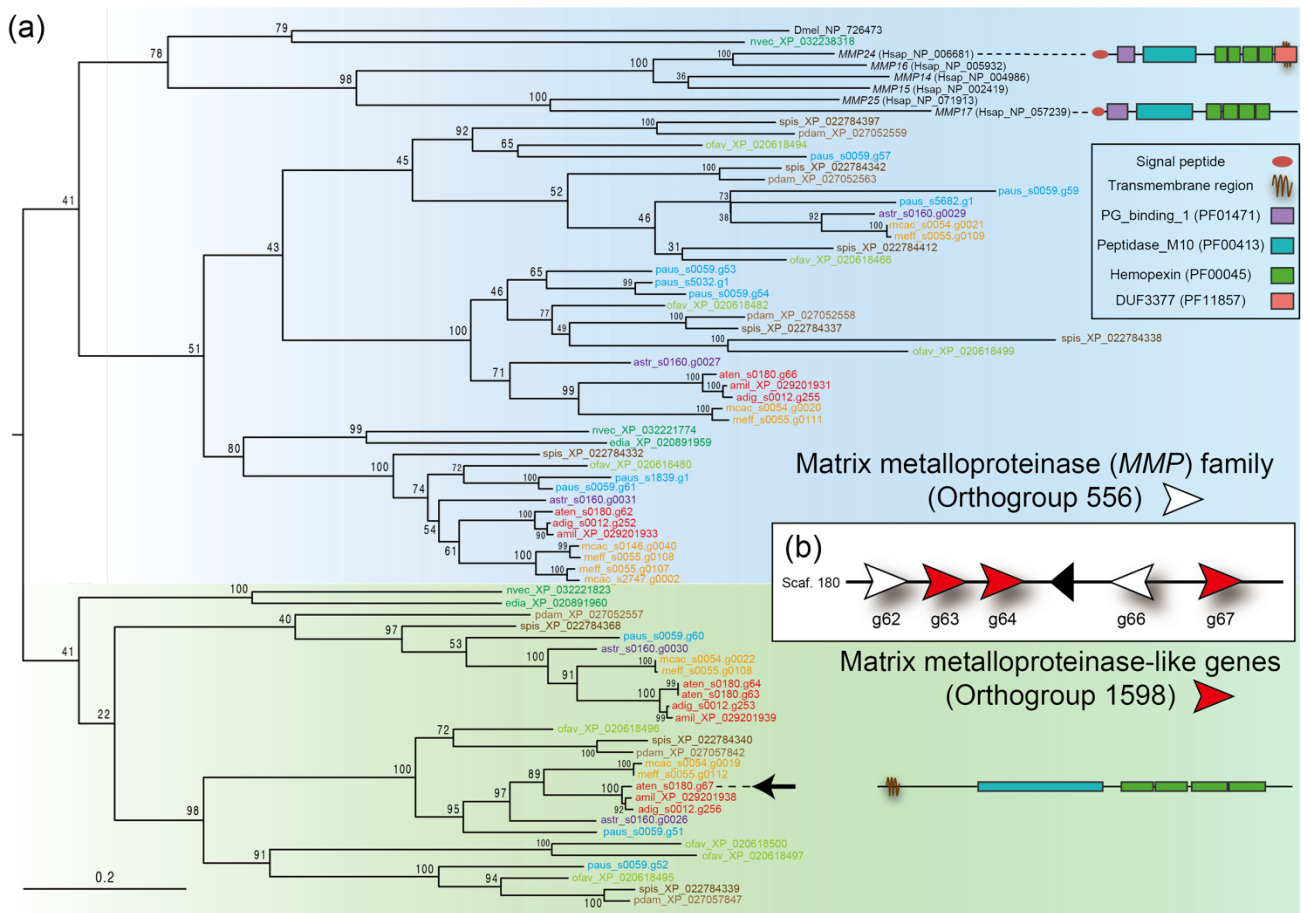

**Supplementary Fig. 13. Molecular phylogenetic analysis of the matrix metalloproteinase (MMP) family.**

**(a)** Phylogenetic tree of the *MMP* family.

409 gap-trimmed, aligned amino acids were used for phylogenetic tree construction (WAG model). Genes are color coded: *Acropora* (red), *Montipora* (yellow), *Astreopora* (purple), *Porites* (light-blue), *Stylophora* (brown), *Pocillopora* (light-brown), *Orbicella* (light-green), sea anemones (green), and bilaterians (black). Species names are abbreviated: *A. tenuis* (aten), *A. digitifera* (adig), *A. millepora* (amil), *M. cactus* (mcac), *M. efflorescens* (meff), *Astreopora myriophthalma* (astr), *Porites australiensis* (paus), *S. pistillata* (spis), *O. faveolata* (ofav), *Pocillopora damicornis* (pdam), *Exaiptasia diaphana* (edia), *Nematostella vectensis* (nvec), *D. melanogaster* (dmel), and *H. sapiens* (hsap). Gene IDs follow species names. A black arrow indicates the DEG. The sequence feature of the DEG and the reference genes (Human *MMP24* and *MMP25*) is shown. Note that these sequence features do not reflect sequence lengths.

**(b)** Tandem duplication of the *MMP* and *MMP*-like genes in *A. tenuis* genome.

Red and white arrows indicate tandemly duplicated *MMP* and *MMP*-like genes on scaffold 180, respectively, and their transcription direction.



(a) Anthozoan Notch ligand-like (*AnNLL*)  
(Orthogroup 1930)

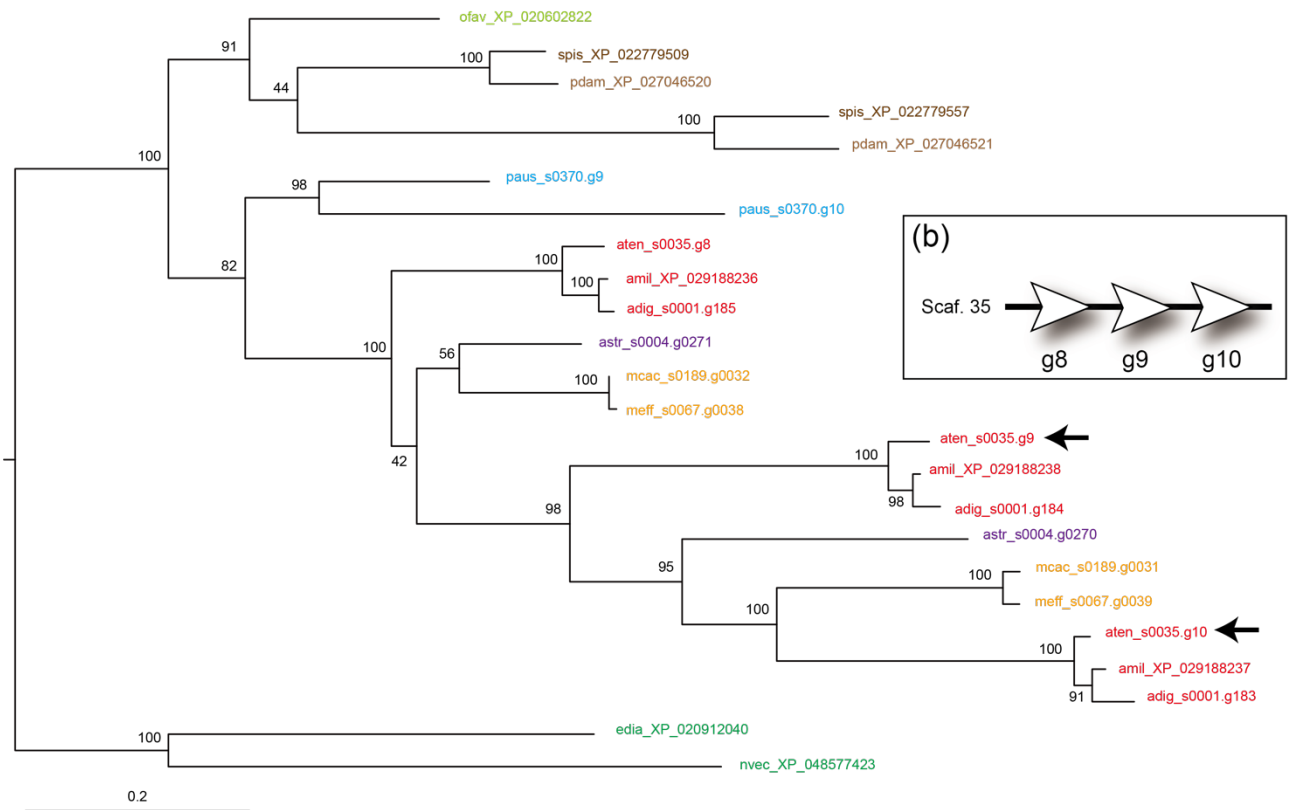

**Supplementary Fig. 14. Molecular phylogenetic analysis of anthozoan Notch ligand-like (*AnNLL*).**

**(a)** Phylogenetic tree of *AnNLL*.

573 gap-trimmed, aligned amino acids were used for phylogenetic tree construction (FLU model). Genes are color coded: *Acropora* (red), *Montipora* (yellow), *Astreopora* (purple), *Porites* (light-blue), *Stylophora* (brown), *Pocillopora* (light-brown), *Orbicella* (light-green), and sea anemones (green). Species names are abbreviated: *A. tenuis* (aten), *A. digitifera* (adig), *A. millepora* (amil), *M. cactus* (mcac), *M. efflorescens* (meff), *Astreopora myriophthalma* (astr), *Porites australiensis* (paus), *S. pistillata* (spis), *O. faveolata* (ofav), *Pocillopora damicornis* (pdam), *Exaiptasia diaphana* (edia), and *Nematostella vectensis* (nvec). Gene IDs follow species names. Black arrows indicate DEGs.

**(b)** Tandem duplication of *AnNLL* in *A. tenuis* genome.

White arrows indicate tandemly duplicated *AnNLL* on scaffold 35 and their transcription direction.

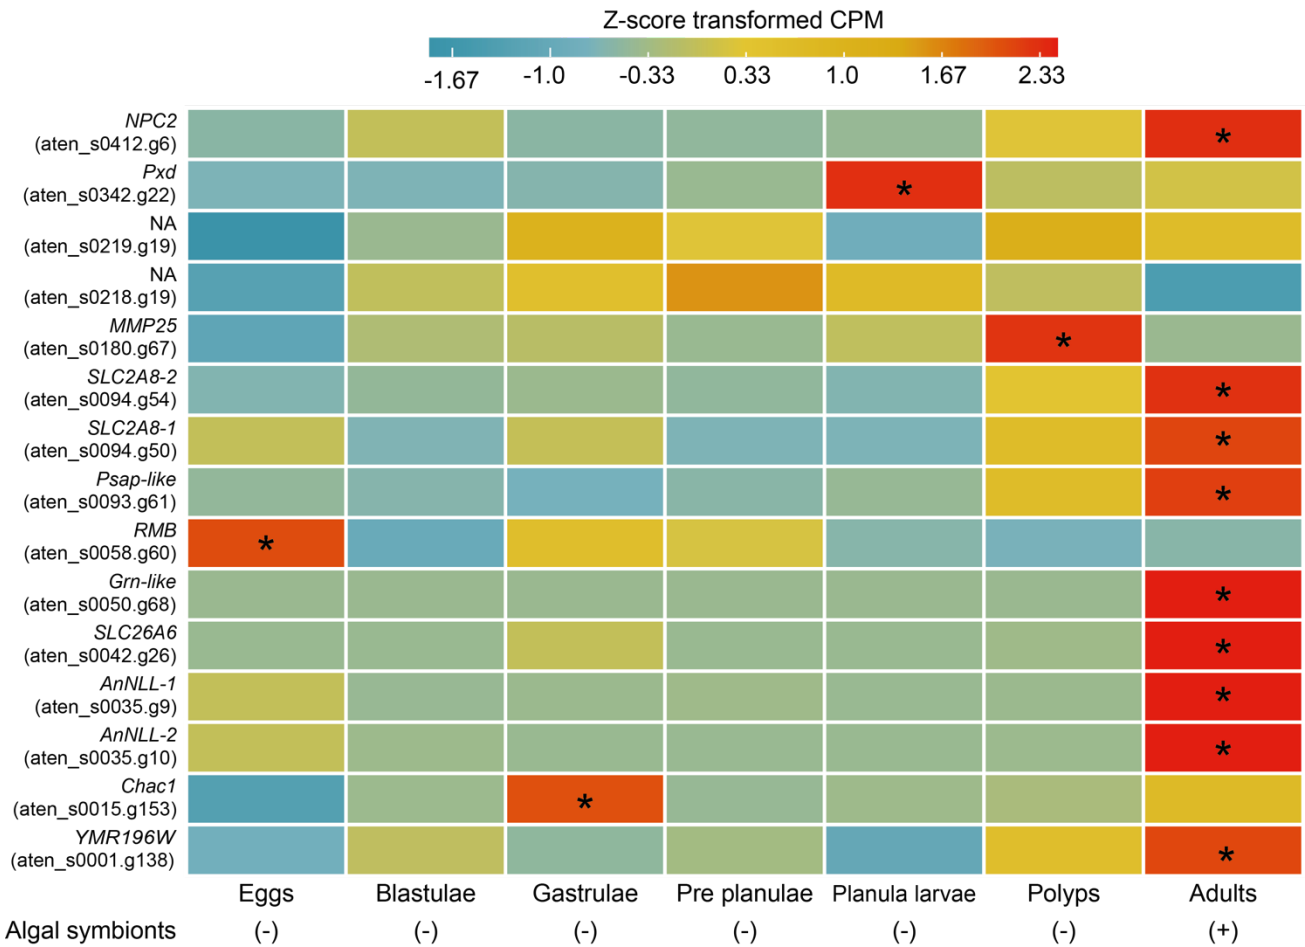

**Supplementary Fig. 15. Comparative expression of the 15 genes in various samples from eggs to an adult colony in *Acropora tenuis*.**

Minus and plus indicate the absence or presence of algal symbiont in samples, respectively. Asterisks indicate significantly higher expression (Z-score > 1.96).

## References

- Yamashita, H., Suzuki, G., Shinzato, C., Jimbo, M. & Koike, K. Symbiosis process between *Acropora* larvae and *Symbiodinium* differs even among closely related *Symbiodinium* types. *Mar Ecol Prog Ser* **592**, 119-128 (2018).
- Yoshioka, Y. *et al.* Whole-Genome Transcriptome Analyses of Native Symbionts Reveal Host Coral Genomic Novelty for Establishing Coral-Algae Symbioses. *Genome Biol Evol* **13**, doi:10.1093/gbe/evaa240 (2021).
